# Supplementary material for: Lesion to the vmPFC abolishes intentionality (mis)attribution in the Knobe effect
Source: Springer Nature journal article supplement (doi:10.1038/s41598-025-03457-y), 2025-07-01
Supplement: MOESM1 [file 41598_2025_3457_MOESM1_ESM.docx]

**Supplementary material**

**Exploratory correlations between lesion size and magnitude of the Knobe effect**

We conducted a series of Spearman's correlations (uncorrected two-sided) between lesion size and the magnitude of the Knobe effect (quantified as the difference in intentionality attribution between negative and positive side effects). Results showed a trend for a negative correlation, such that larger lesions tended to be associated with a weaker Knobe effect, that did not reach statistical significance in our relatively small sample (see table 1).

| **Table 1. Correlation matrix between lesion size and magnitude of the Knobe effect (N=10)** | | | | |
| --- | --- | --- | --- | --- |
|  |  | **Tot. prefrontal cc (BAs 10, 11, 24, 25, 32)** | **Tot. cortical lesioned voxels** | **Tot. lesioned voxels** |
| **Magnitude of Knobe effect** | Spearman's rho | -0.261 | -0.152 | -0.200 |
| p-value | 0.466 | 0.682 | 0.584 |

**Exploratory analyses on the role of the insula in the Knobe effect**

Given the key role of the insula in integrating bodily and emotional states into moral judgment, an even greater reduction of the Knobe effect may occur in patients with both prefrontal and insular damage. Thus, we examined the extent of damage to the insular cortex in each vmPFC patient. The lesion mapping indicates that the insular cortex was involved in the lesion in only 4 out of 10 patients, and that, in these patients, the insula damage represented only a small portion of the lesion (see table 2 below). Interestingly, contrary to our initial expectation, vmPFC patients with insula damage showed a numerically larger, albeit non-significant, Knobe effect (M = 0.550, SD = 1.18) compared to those without insula damage (M = 0.383, SD = 2.61; Mann-Whitney U p = 0.762).

| **Table 2. Lesion extent in the insula (in cc), and percentage of insular lesion extent relative to total lesion volume** | | | | |
| --- | --- | --- | --- | --- |
|  | **Insula Left** | **Insula Right** | **% insula R of total** | **% insula L of total** |
| **vmPFC1** | 0 | 0 | 0.00% | 0.00% |
| **vmPFC2** | 0.014 | 2.095 | 0.05% | 7.63% |
| **vmPFC3** | 0 | 0 | 0.00% | 0.00% |
| **vmPFC4** | 0.008 | 0 | 0.01% | 0.00% |
| **vmPFC5** | 0 | 0 | 0.00% | 0.00% |
| **vmPFC6** | 0 | 0 | 0.00% | 0.00% |
| **vmPFC7** | 11.734 | 0 | 14.59% | 0.00% |
| **vmPFC8** | 0 | 0 | 0.00% | 0.00% |
| **vmPFC9** | 0 | 0 | 0.00% | 0.00% |
| **vmPFC10** | Scan unavailable | Scan unavailable | Scan unavailable | Scan unavailable |
| **vmPFC11** | 0.283 | 0 | 0.57% | 0.00% |

Nevertheless, considering these additional lesion data, we repeated the correlations reported in Table 1, partialling out the lesion size in the insula. Similarly to the previous results, no significant correlation emerged (all p≥ 0.476). Additionally, Spearman's correlations (uncorrected two-sided) specifically with size of the insula lesion also were not significant (see Table 3 below). However, we believe that the limited variability in insula lesion size within our vmPFC group, alongside the small sample size, limit the conclusions we can draw from these additional analyses on the role of the insula in the Knobe effect, an issue worth investigating in future studies.

| **Table 3. Correlation matrix between insula lesion size and magnitude of the Knobe effect (N=10)** | | | |
| --- | --- | --- | --- |
|  |  | **Tot. insula right cc** | **Tot. insula left cc** |
| **Magnitude of Knobe effect** | Spearman's rho | 0.406 | -0.014 |
| p-value | 0.244 | 0.970 |
